# Supplementary material
Source: publisher figshare collection journal article supplement (https://gsajournals.figshare.com/articles/dataset/_/13224920)

Supplemental Figure 1

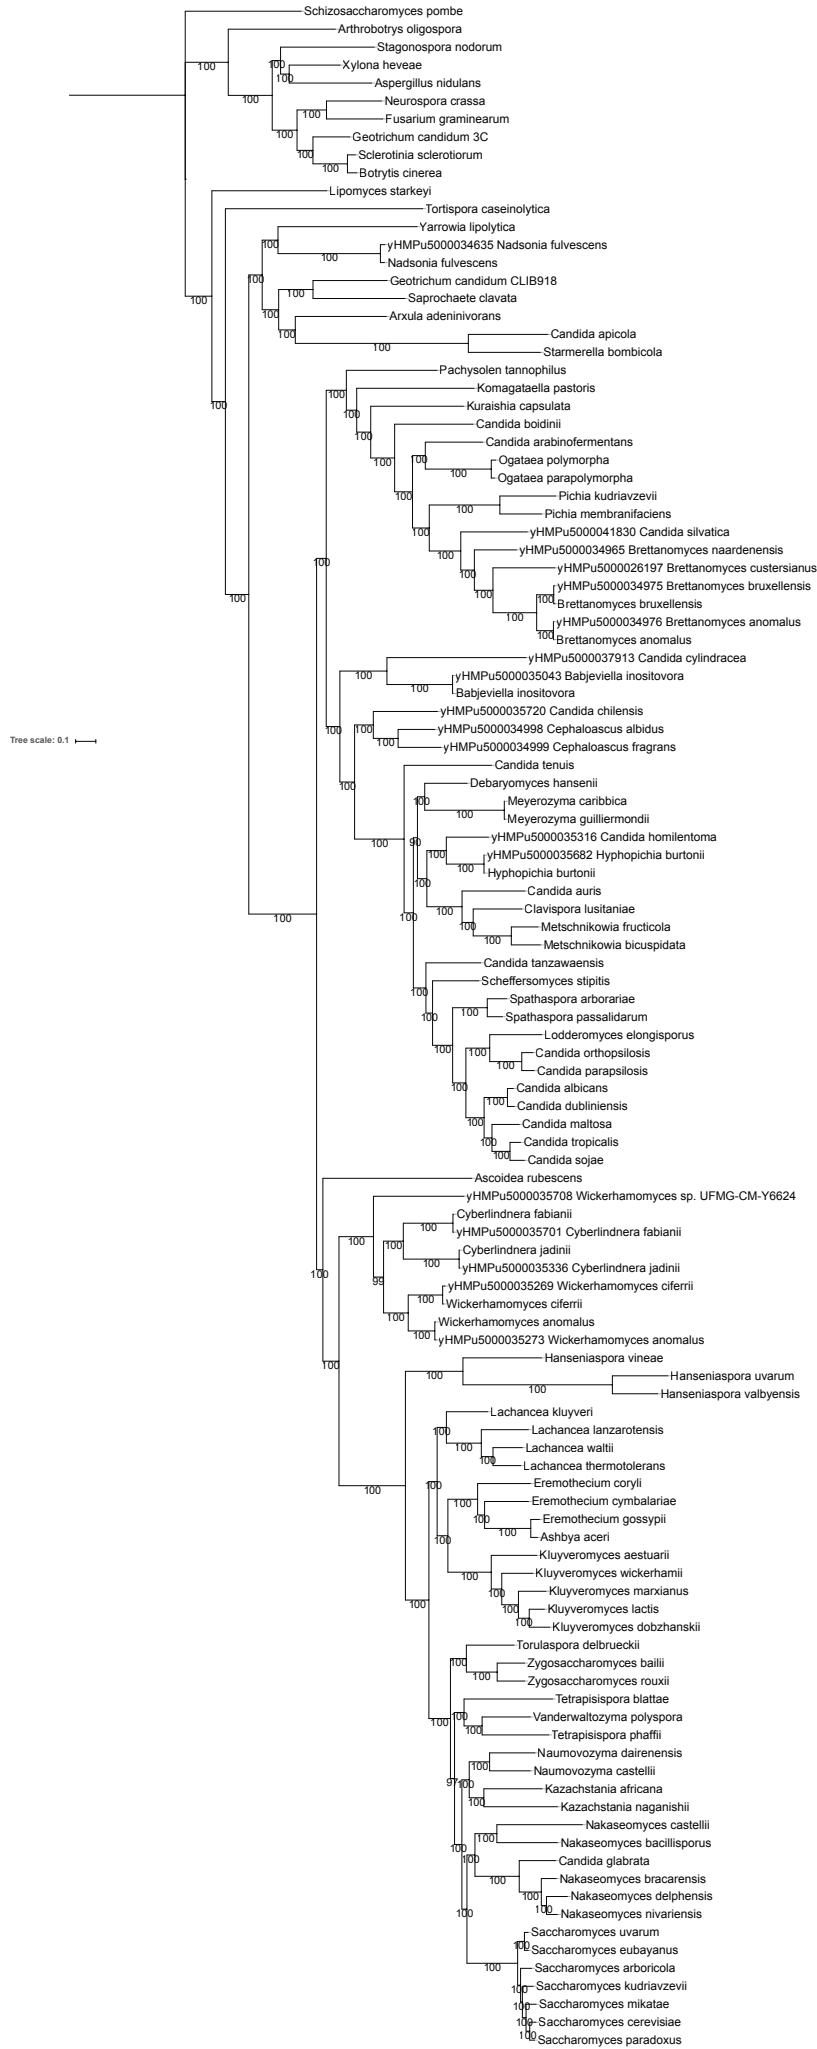

Supplemental Figure 2

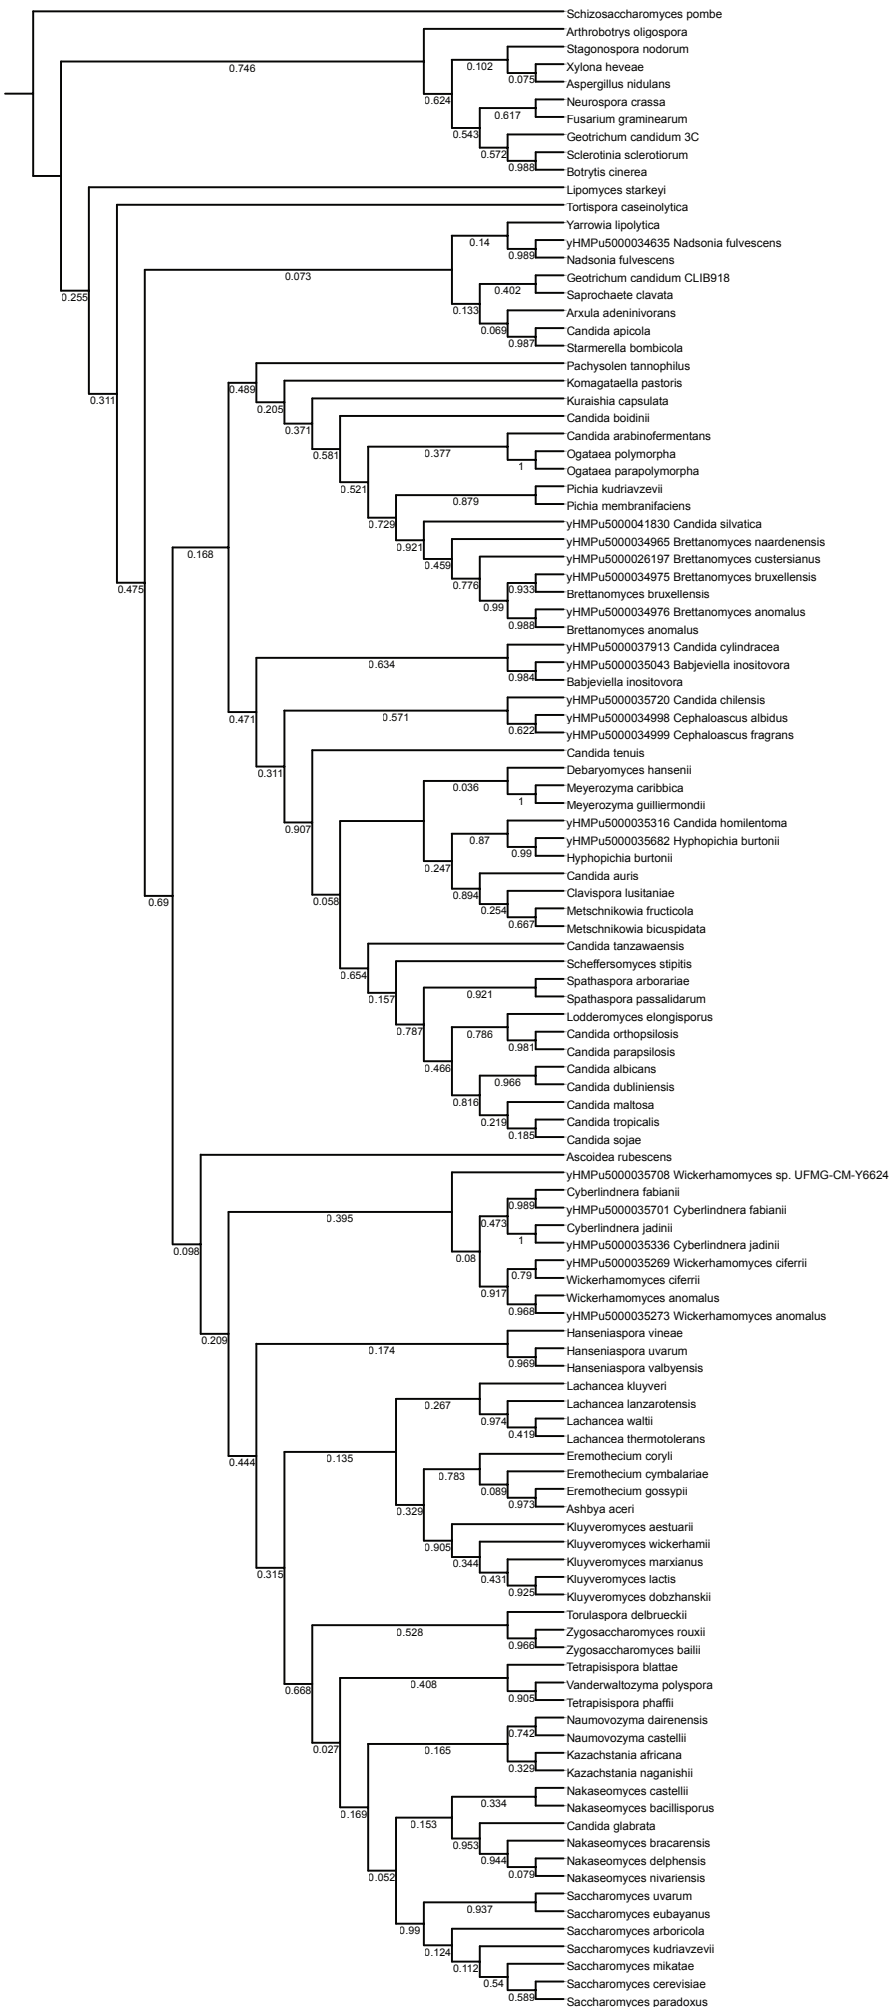

Supplemental Figure 3

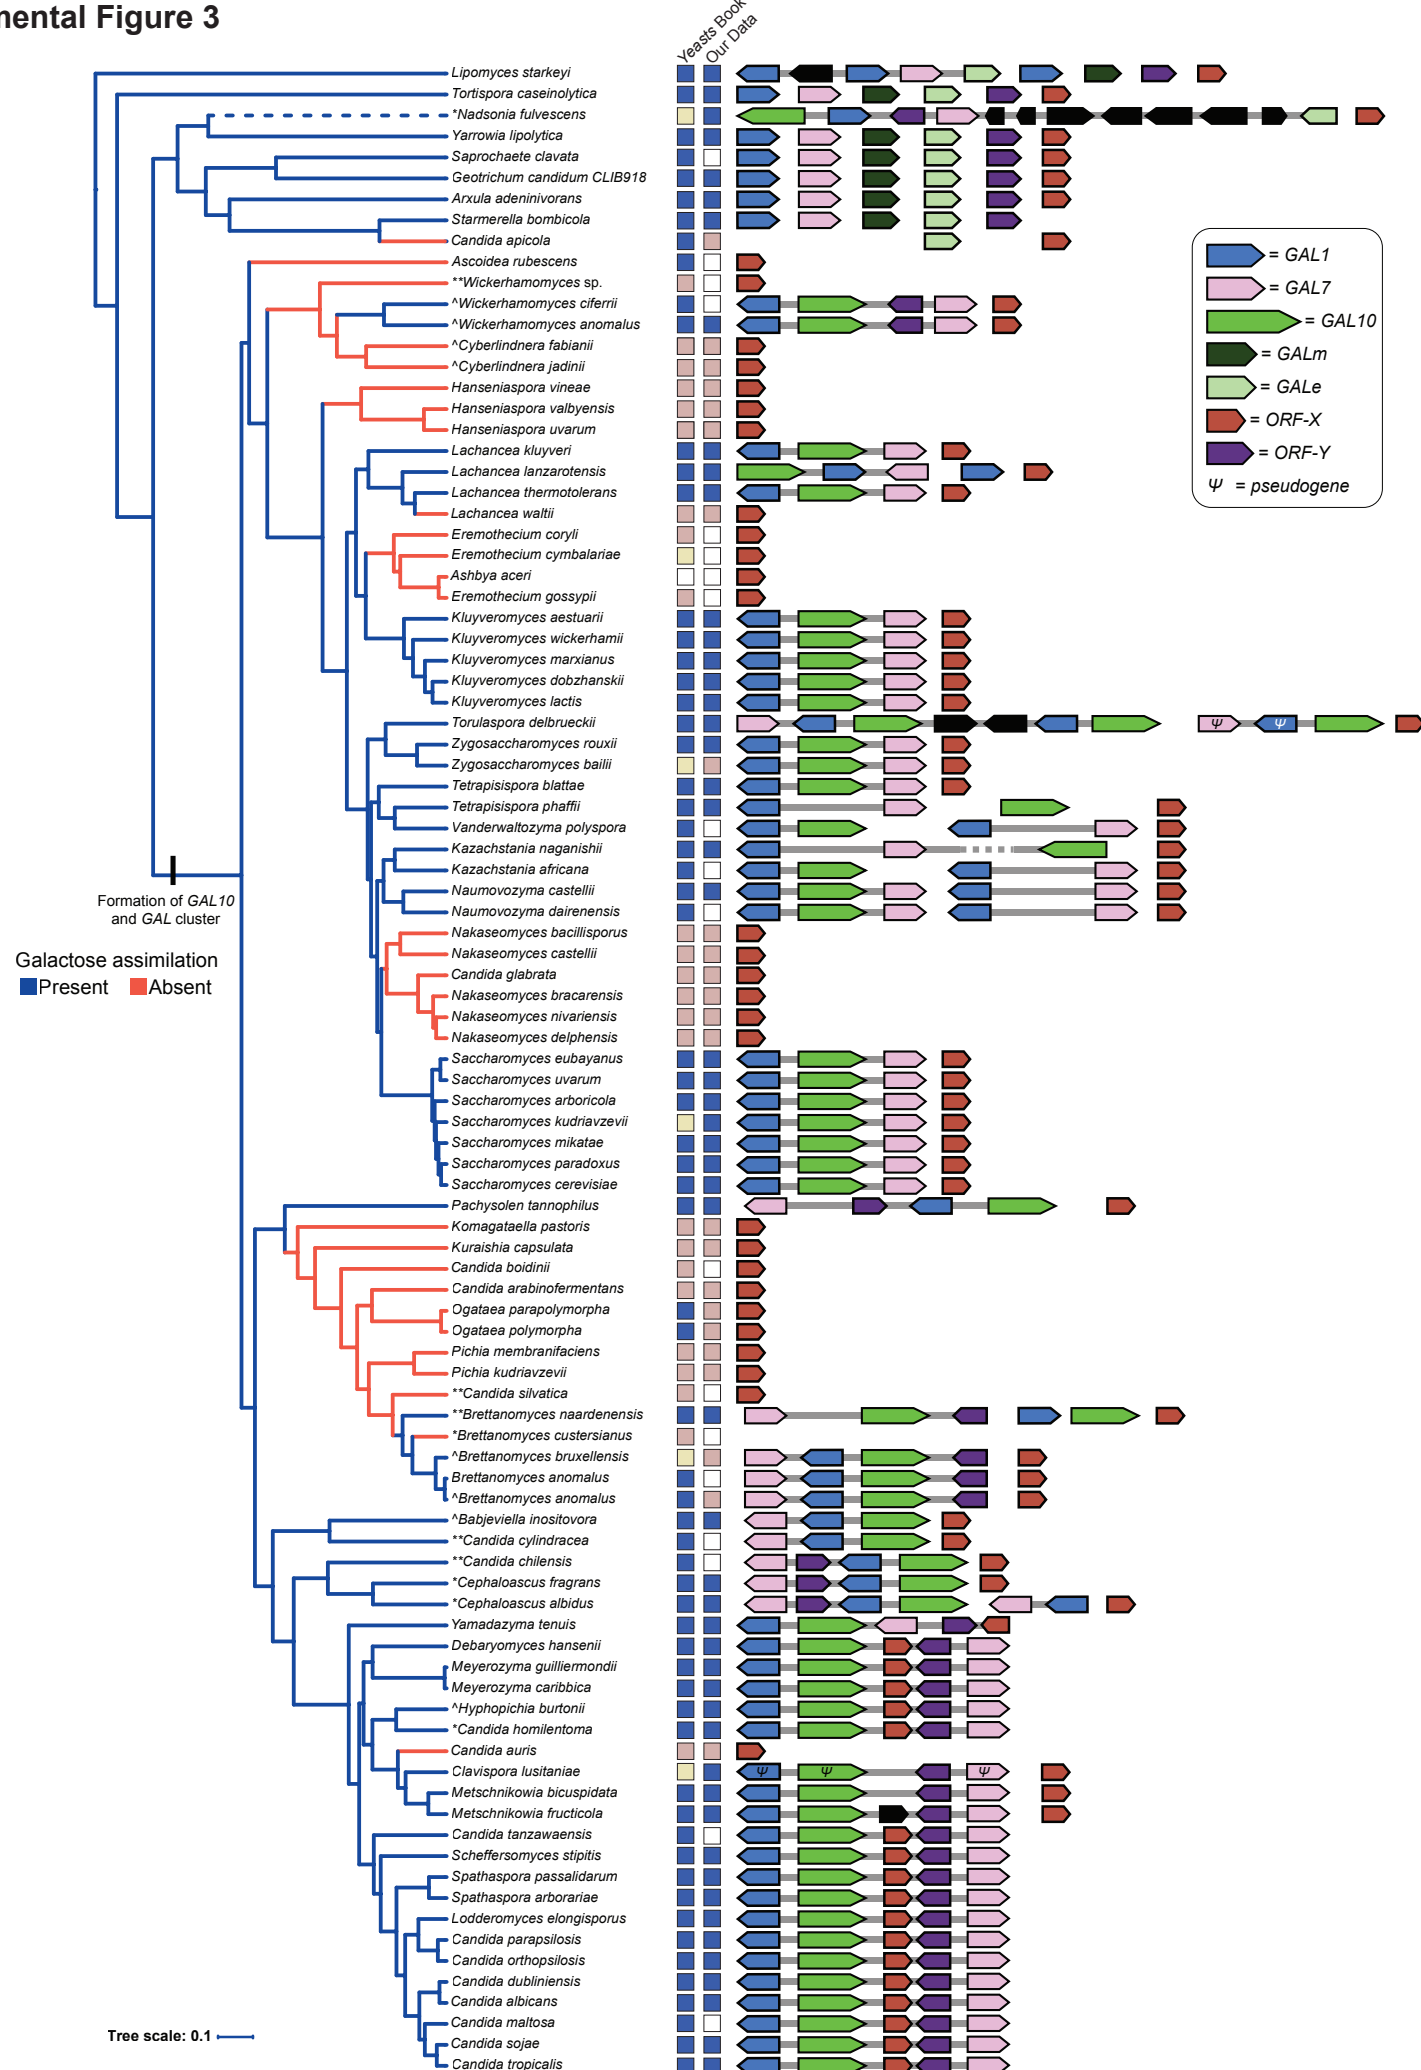

Supplemental Figure 4

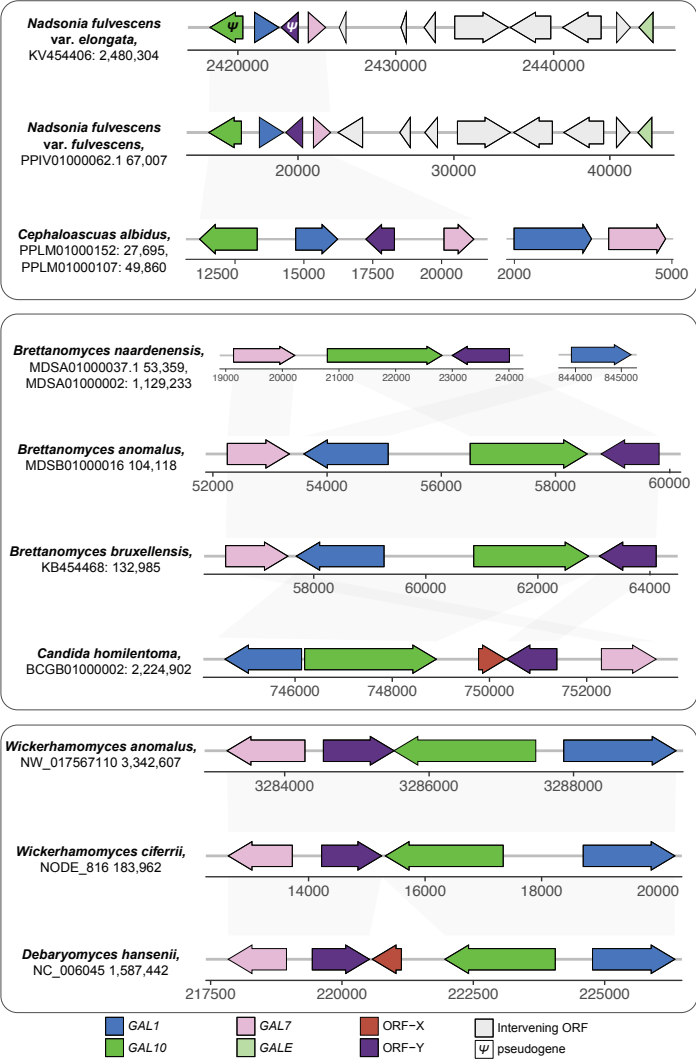

Supplemental Figure 5

|                        |              |                                                                                                                 |
|------------------------|--------------|-----------------------------------------------------------------------------------------------------------------|
| fulvescens<br>elongota | 1<br>1       | ATGCTCTTATGTATTAGTTACCGGCGGTGCTGGTTATATCGGCTCCCATACAGTGGTTGAG<br>..A..C.....C..C.....                           |
| fulvescens<br>elongota | 61<br>61     | CTTTTCAACAATGGCTACAGCGTAGTCATTGTGATAACTTGGTCAATTCTCTCTACGAC<br>-.....A...-A.....C...-.....                      |
| fulvescens<br>elongota | 121<br>118   | TCAGTAGCAAGACTAGAAGTCTTGTAAGCGGAAGATTCCCCTTTTCAAAATCGACACT<br>.....G..C.....-..GAAG.....T...                    |
| fulvescens<br>elongota | 181<br>177   | AGTGACGCCATAGTCTGGATGCCGTCTTCAAGCAGTACAAGATCGACTCAGTCTTGCAC<br>.....A.....A..A.....A.....                       |
| fulvescens<br>elongota | 241<br>237   | TTTGCCGCTTTAAAGGCCGTTGGCGAATCGACCAAGATTCTCTTGAATACTATGAAAAAC<br>.....TA.AA.T.....A.....C.....                   |
| fulvescens<br>elongota | 301<br>297   | AACGTTGGTGGCACTATTGCTTTATTAAGATGATGCGACAAACAATTGTAATAAAATTT<br>..T...A.C....C.....A.....T..T.....T.....         |
| fulvescens<br>elongota | 361<br>357   | GTGTTTTCTTCTCGGCTACCGTCTACGGAGATGCTACGCGATTCCCCGATATGATACCT<br>.....A.....T.....                                |
| fulvescens<br>elongota | 421<br>417   | ATTCCTGAACACTGTCTACCGGCCCTACCAACCCTTATGGCATGACAAAAATTACCATC<br>.....T.....C.....T..C..G.....C.....              |
| fulvescens<br>elongota | 481<br>477   | GAGAACATCATTAGAGATCTCTTCAGTAGCGACAATCATGGAAGTCGGCTATTTTGAGA<br>.....C..C.....                                   |
| fulvescens<br>elongota | 541<br>537   | TATTTTAATCCCATTTGGCGCTCACCCATCTGGGTTAATTGGCGAAGATCCTTTGGGTATC<br>.GC.A.....CC..G...T..G....C....C...            |
| fulvescens<br>elongota | 601<br>597   | CCCAACAACCTATTGCCCCTTCTTAGCCCAGGTTGCCATTGGCCGCCGAGAGAAGATGTGC<br>.....T.....T.....A.....A...A..                 |
| fulvescens<br>elongota | 661<br>657   | ATTTTTGGTGATAATTATGATTCTAAAGATGGAAGTCCCATTCGTGATTATATACATGTA<br>.....G...G.....C.G.....C..C..G                  |
| fulvescens<br>elongota | 721<br>717   | GTTGATTTGGCCAAGGGCCATATGCGGCTCTTGACCACTTGACGAATCGCAGCAAGGA<br>.....A.A.....C..C..C..A.TT...A..T...A.....G       |
| fulvescens<br>elongota | 781<br>777   | TTATGCCGTGAATGGAAGTGGGTACAGGTAACGGTTCTACCGTAATCGAAGTCTTCAAC<br>.....C.....T.....                                |
| fulvescens<br>elongota | 841<br>837   | GCTTTCTGTAAGGCCGTAGGTAGAGACTTGCCGTTTGAAATCGCCGTCGCCGAGCCGGT<br>.....A.....C...TC.A..C.....TA...C.....AT...      |
| fulvescens<br>elongota | 901<br>897   | GATGTACTAAACCTTACGCGCAGACGCTAGAAGAGCGAACAAGAGTTGAAATGGCATGCG<br>A.C.....G..T.....A.....TCA.A                    |
| fulvescens<br>elongota | 961<br>957   | GAATTATCCATTGATGATGCCTGTAAGGATTTGTGGAATGGACAACGATAATCCTATG<br>.....C...C.....A.....GGA.....CG.....              |
| fulvescens<br>elongota | 1021<br>1017 | GGGTTTCAAATTGAAAGATTACAAATGGAAGCACTTCAATAATGAATCCCATTTTGAAGAT<br>.....C.....A.-...G.....G..T.....               |
| fulvescens<br>elongota | 1081<br>1076 | AGATTACATACTTTAATTTCCAGTGACGGAAGTTTCAATTCTCCGTTAGCAATCTGGGA<br>.....T.....G.....T..T.G.....G.....T...           |
| fulvescens<br>elongota | 1141<br>1136 | GCTAGTGTGTGGATGCGTCTCTGGACGGTGTTAAACTGTGCTGTGGTTTCGATAATGAA<br>.....GT.....G..A...A.A...T.....                  |
| fulvescens<br>elongota | 1201<br>1196 | GAAGGTTATTTGAGAAAGGATAACCCCTTTCTTTGGCGCCACCATTGGCAGGGTTGCCAAT<br>.....C..A.....CA.....G.....AAA..-A...          |
| fulvescens<br>elongota | 1261<br>1255 | AGAGTCAAGGGTGGTAAATTAACGTGTTAACGGCTCTACTTATCAGCTACCCCTAAATGAA<br>.....C.....C..A.....T.....G                    |
| fulvescens<br>elongota | 1321<br>1315 | AATGGTGTCAATACTATTCATGGTGGGTATCCGGATTGACAAAAAACTTTTCTTGGGT<br>...A.....C.....A.....G.....G                      |
| fulvescens<br>elongota | 1381<br>1375 | CAAATTGTTCTGTAAGAATCTCCAACTGATTTAAACCAATGGAATTTTACTTGTGAC<br>T.C.....CT.....GC.....AT..T.....A.....             |
| fulvescens<br>elongota | 1441<br>1435 | AAAGATGGTGAAAACAACCTCCAGGTGATTTAGAGGTCAAGGTAATCTACACTCTTCAA<br>G.G..G.....T..T.....C...TC.....T...T.....        |
| fulvescens<br>elongota | 1501<br>1495 | AAGTGCGAAAAGGGTGGCGCCATCGGCTTGGAATACGAAGCTAAATTATTCGCTGATACT<br>..A..T.....T..T.A.....A.....C....A.....         |
| fulvescens<br>elongota | 1561<br>1555 | AATGTCCATGAAACTGCCGTTTCCATTACCAATCATACCTATTGGAACATCGGGAATAAC<br>..A...CC.....T.....T.....T.....                 |
| fulvescens<br>elongota | 1621<br>1615 | TCTACTATAGAGGGTACTGAAATCGCTTTAATTACCGATAAACATTGTCAGGTTGGAGCT<br>.....A.C...-GG....C..T.....A.....ATG...         |
| fulvescens<br>elongota | 1681<br>1672 | GATTTATTGCCGACCAGGGATATAATCATCAATAATAATATCGCCAGGATTGAATCCGCT<br>.....GC.TT.....-C.T.....G.....CT.....A.....     |
| fulvescens<br>elongota | 1741<br>1728 | AAATTTACTACTTTGAATCAAAATCTCCTGAATTTGACTATTGTTTACTGTTGCGGAT<br>....C.....TC..GG.....C.....T...C..C....C...A..... |
| fulvescens<br>elongota | 1801<br>1788 | CCC---AGAATTTTCAAATCGATACAGGTCCAAGAATATGCAAGTTATCGCTAAGGCT<br>...A---A..A.....CC...A.....TC.....                |
| fulvescens<br>elongota | 1860<br>1848 | TACCATCTGAAACCAAGATCCGCTTTATAACCTCTACAACGAACCGTCATTCCAAATTT<br>.....G.....A.....T.....C.....T..C..              |
| fulvescens<br>elongota | 1920<br>1908 | TACACTGGTGACCATATTAATGTTGAAGGTTATTTGGAAAGCGTGCTGGATTTTGCTTA<br>.....A.....C.....C.....A.C.....                  |
| fulvescens<br>elongota | 1980<br>1968 | GAGGCTGCTAGGTTTATTGATTCTCTGTAACACGAAGATTGGCGGGCAGGTATGGTATTA<br>.....C.....A.....T.....A.....C.....             |
| fulvescens<br>elongota | 2040<br>2028 | AAGAATGGGGAAGTCTACGGTTCAAAGACCCTATACAGTTTCAGCACTGAATAG<br>.....G.....GT..T..G..G..C....A...A.....               |

Supplemental Figure 6

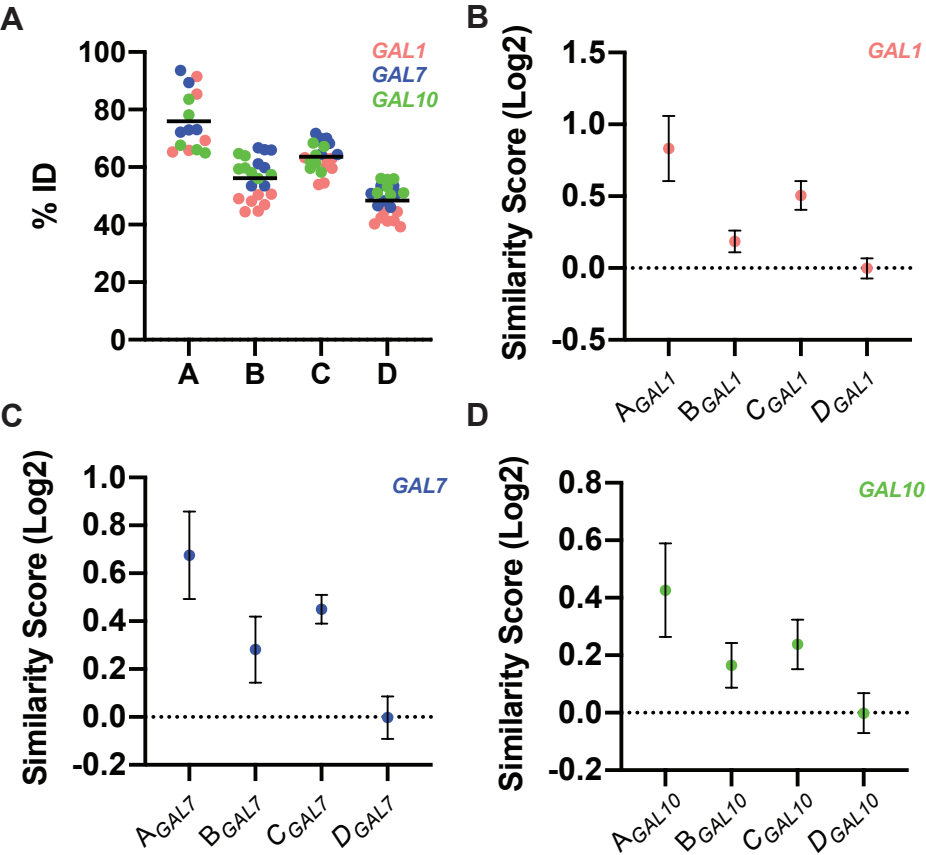

Supplemental Figure 7

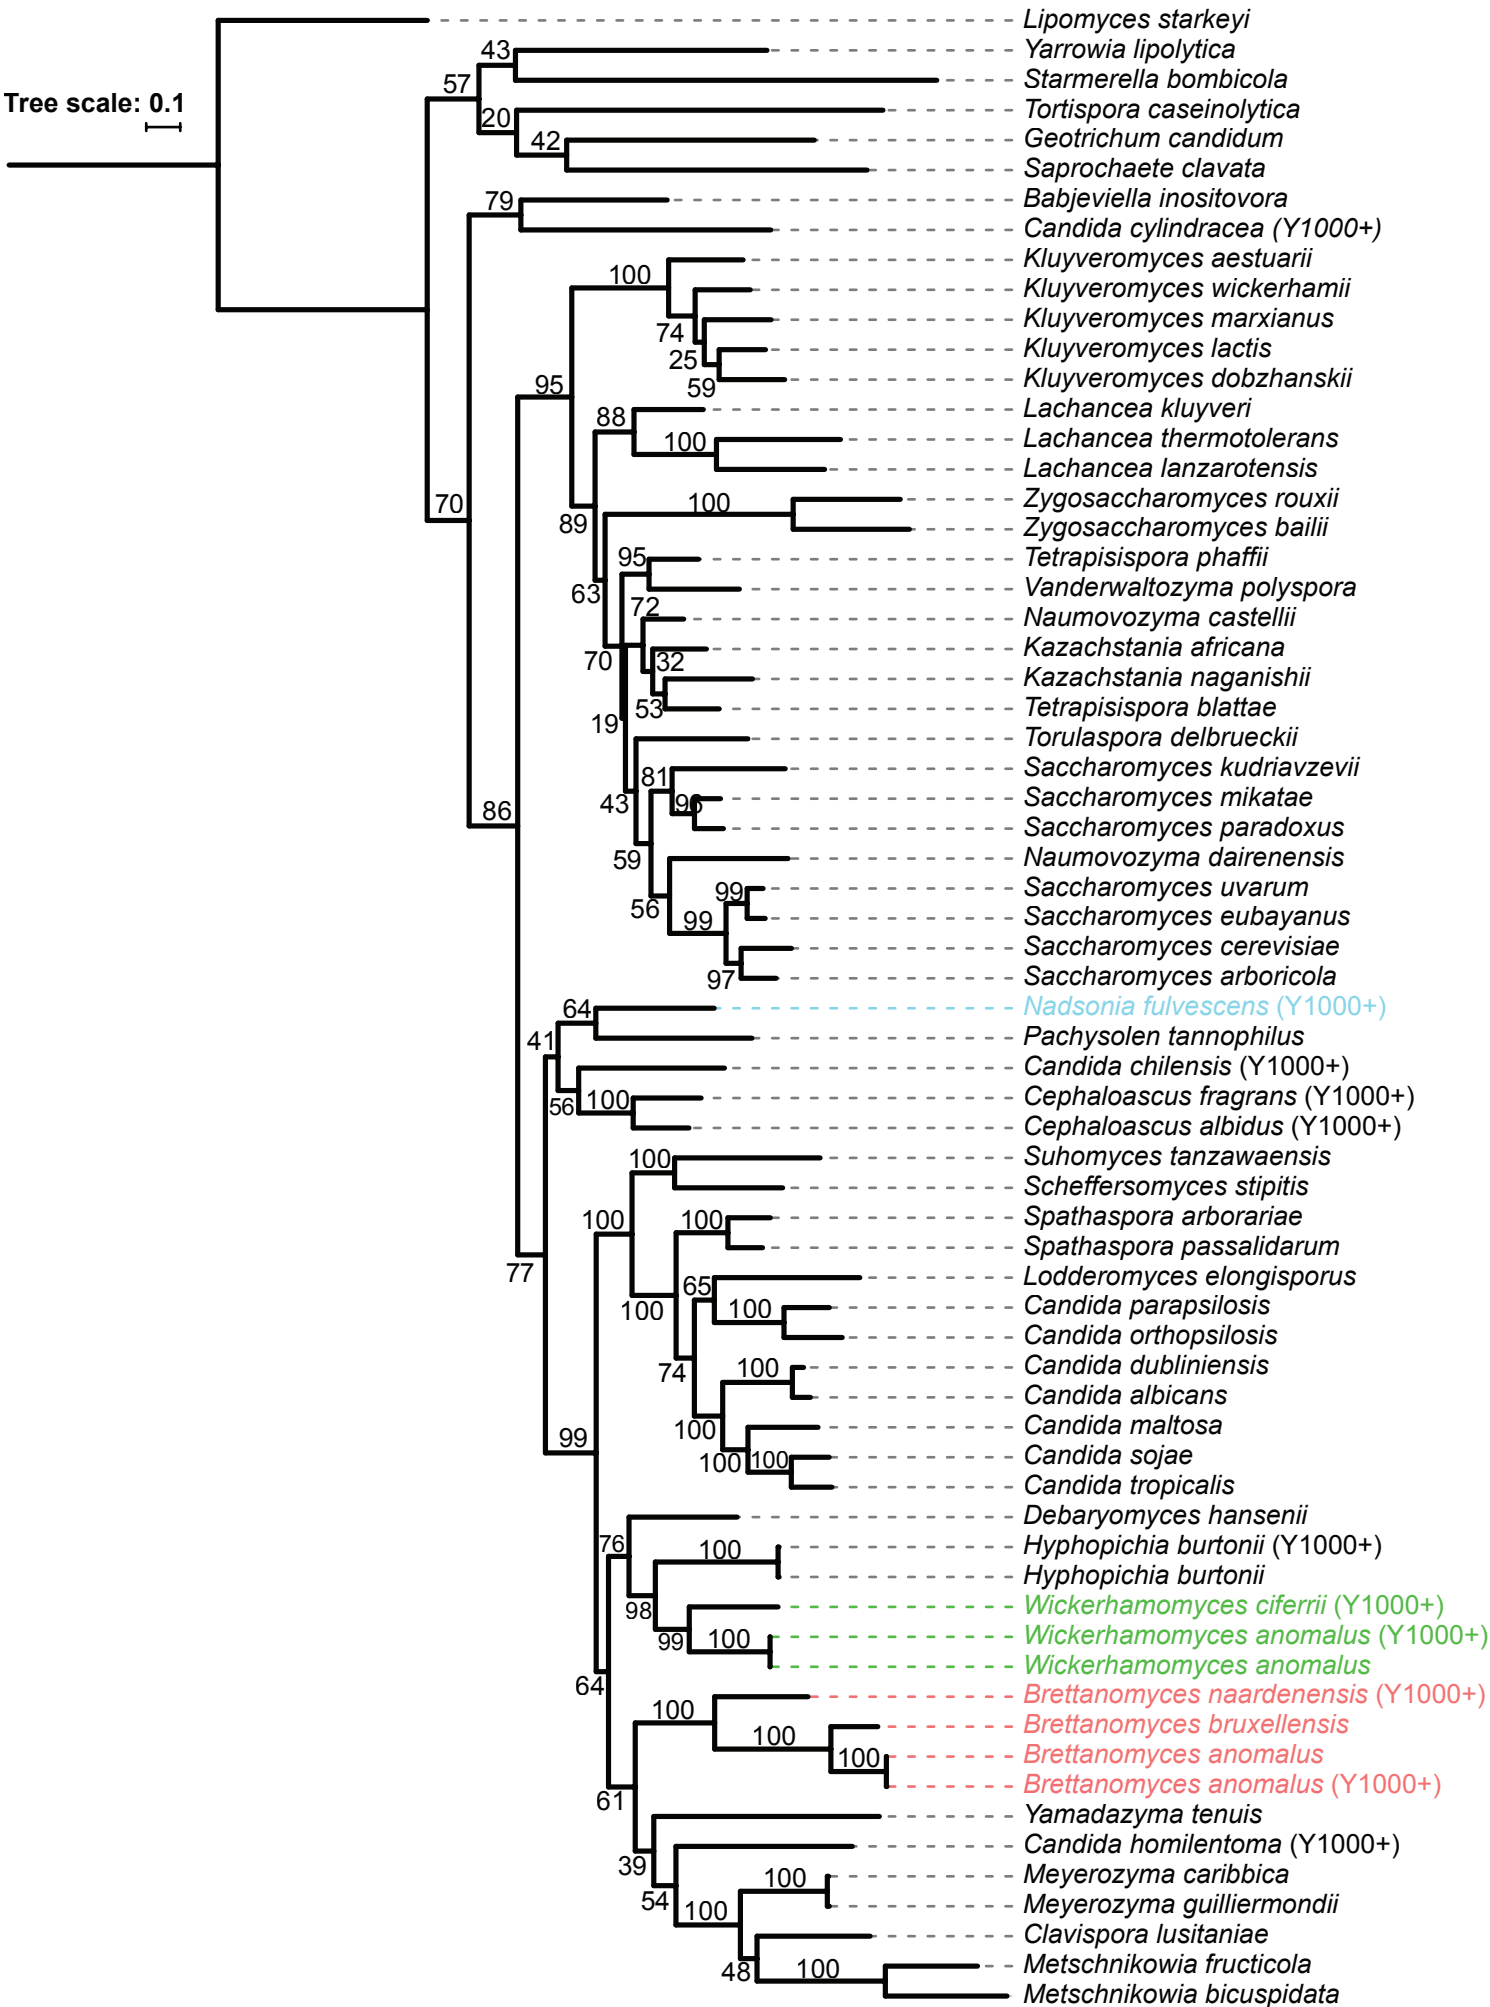

Supplemental Figure 8

Tree scale: 0.1

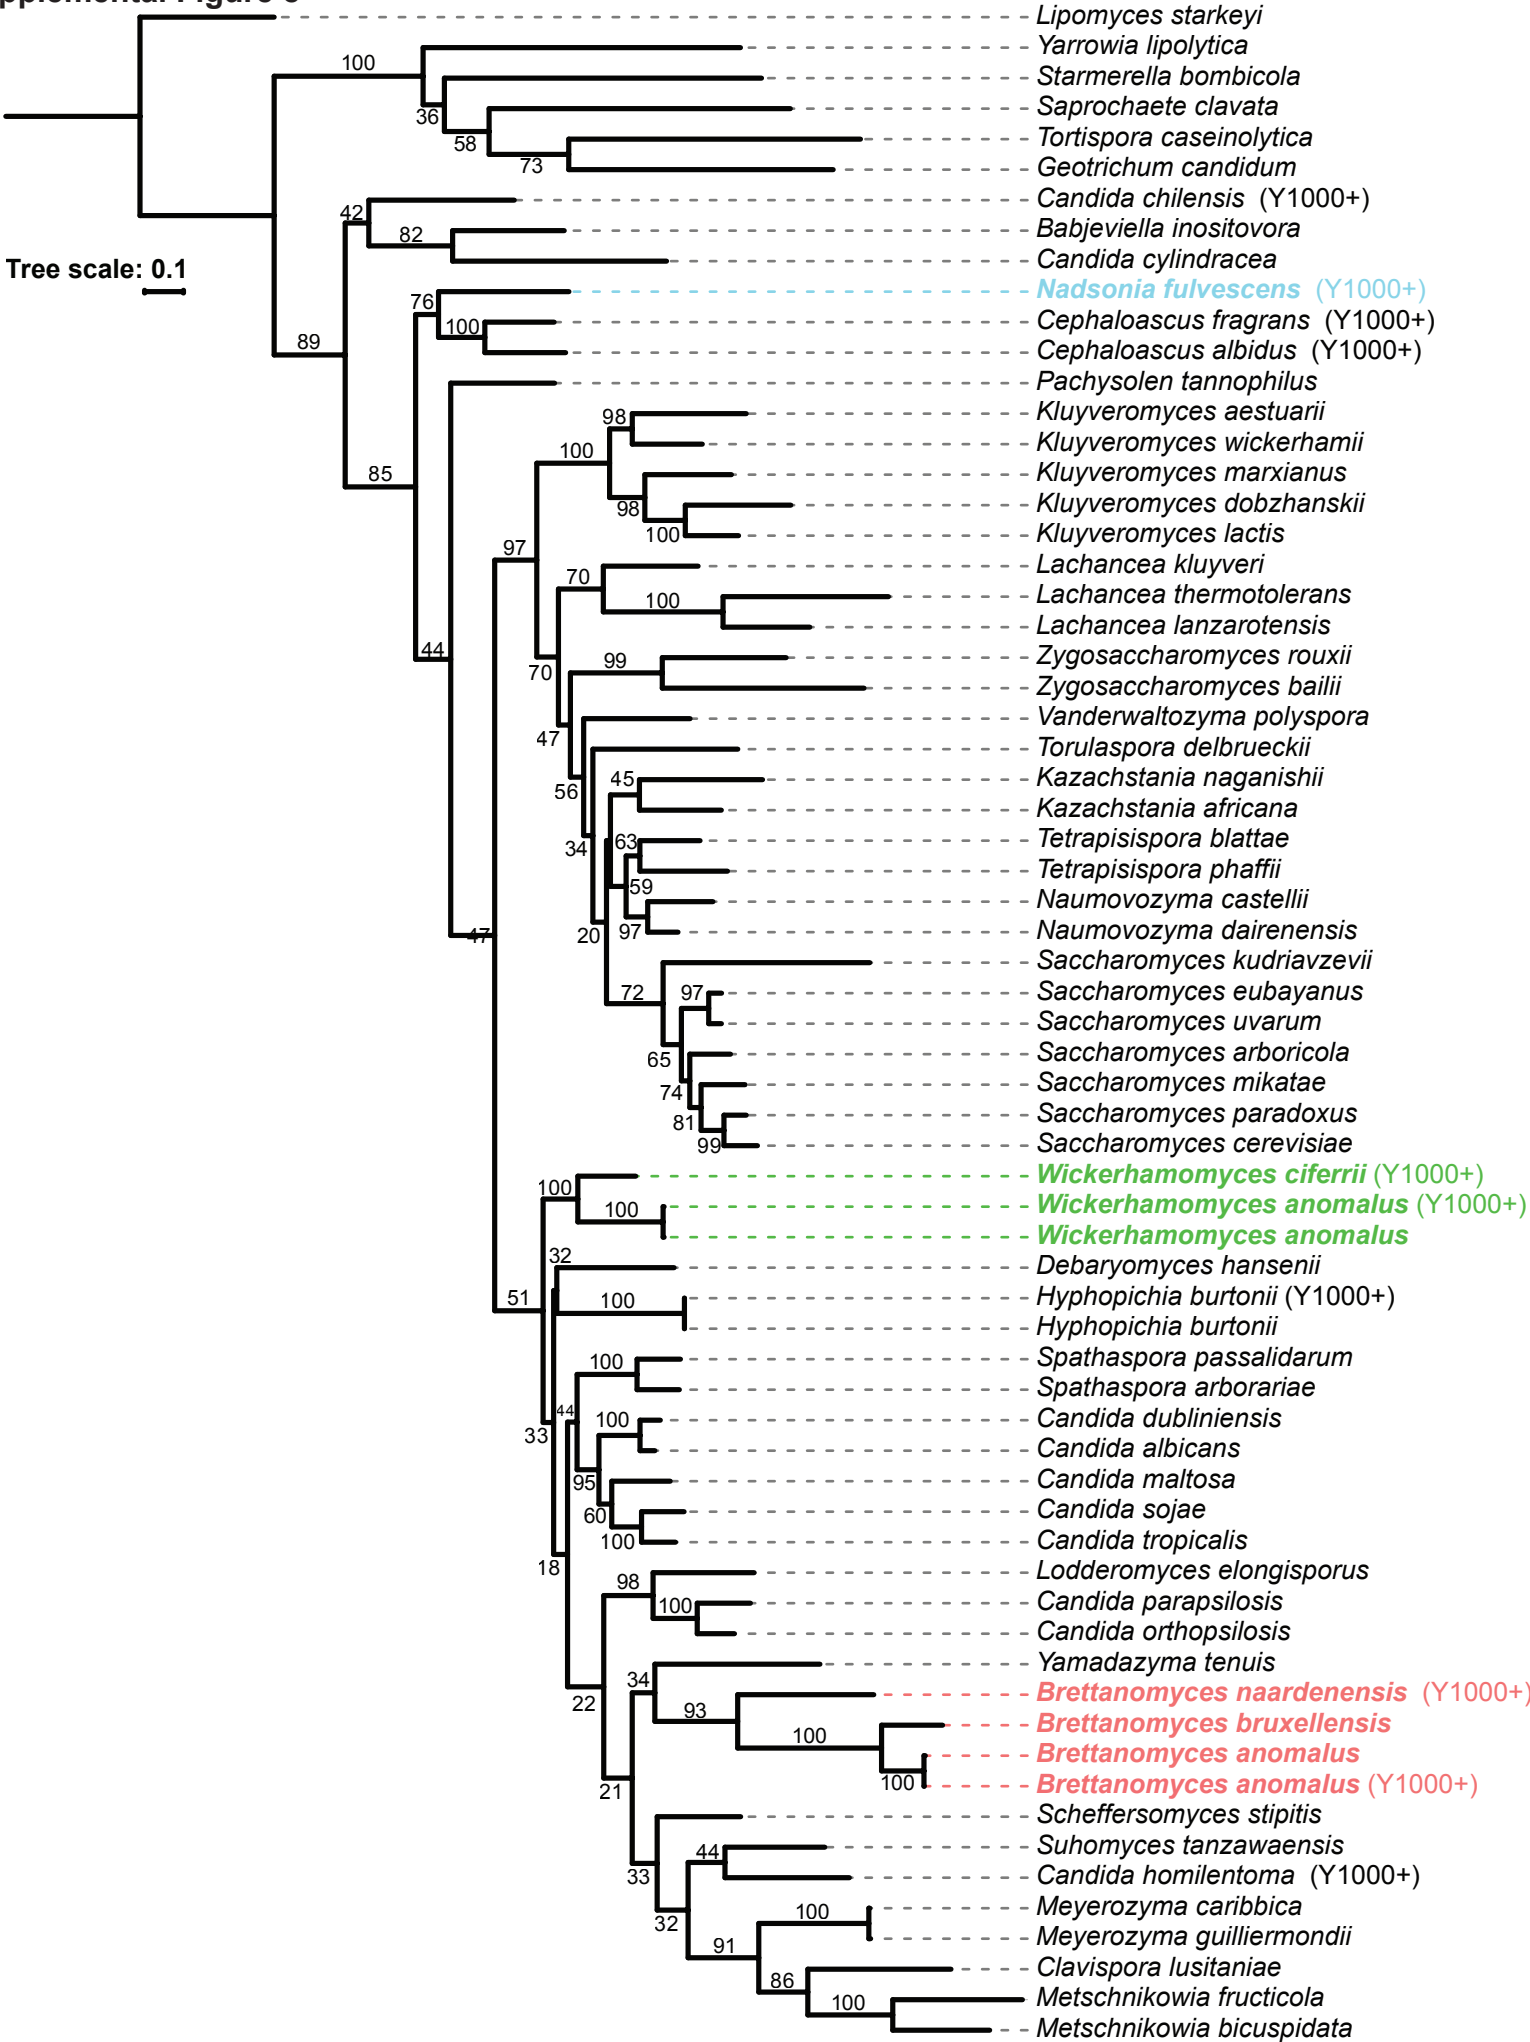



Supplemental Figure 9

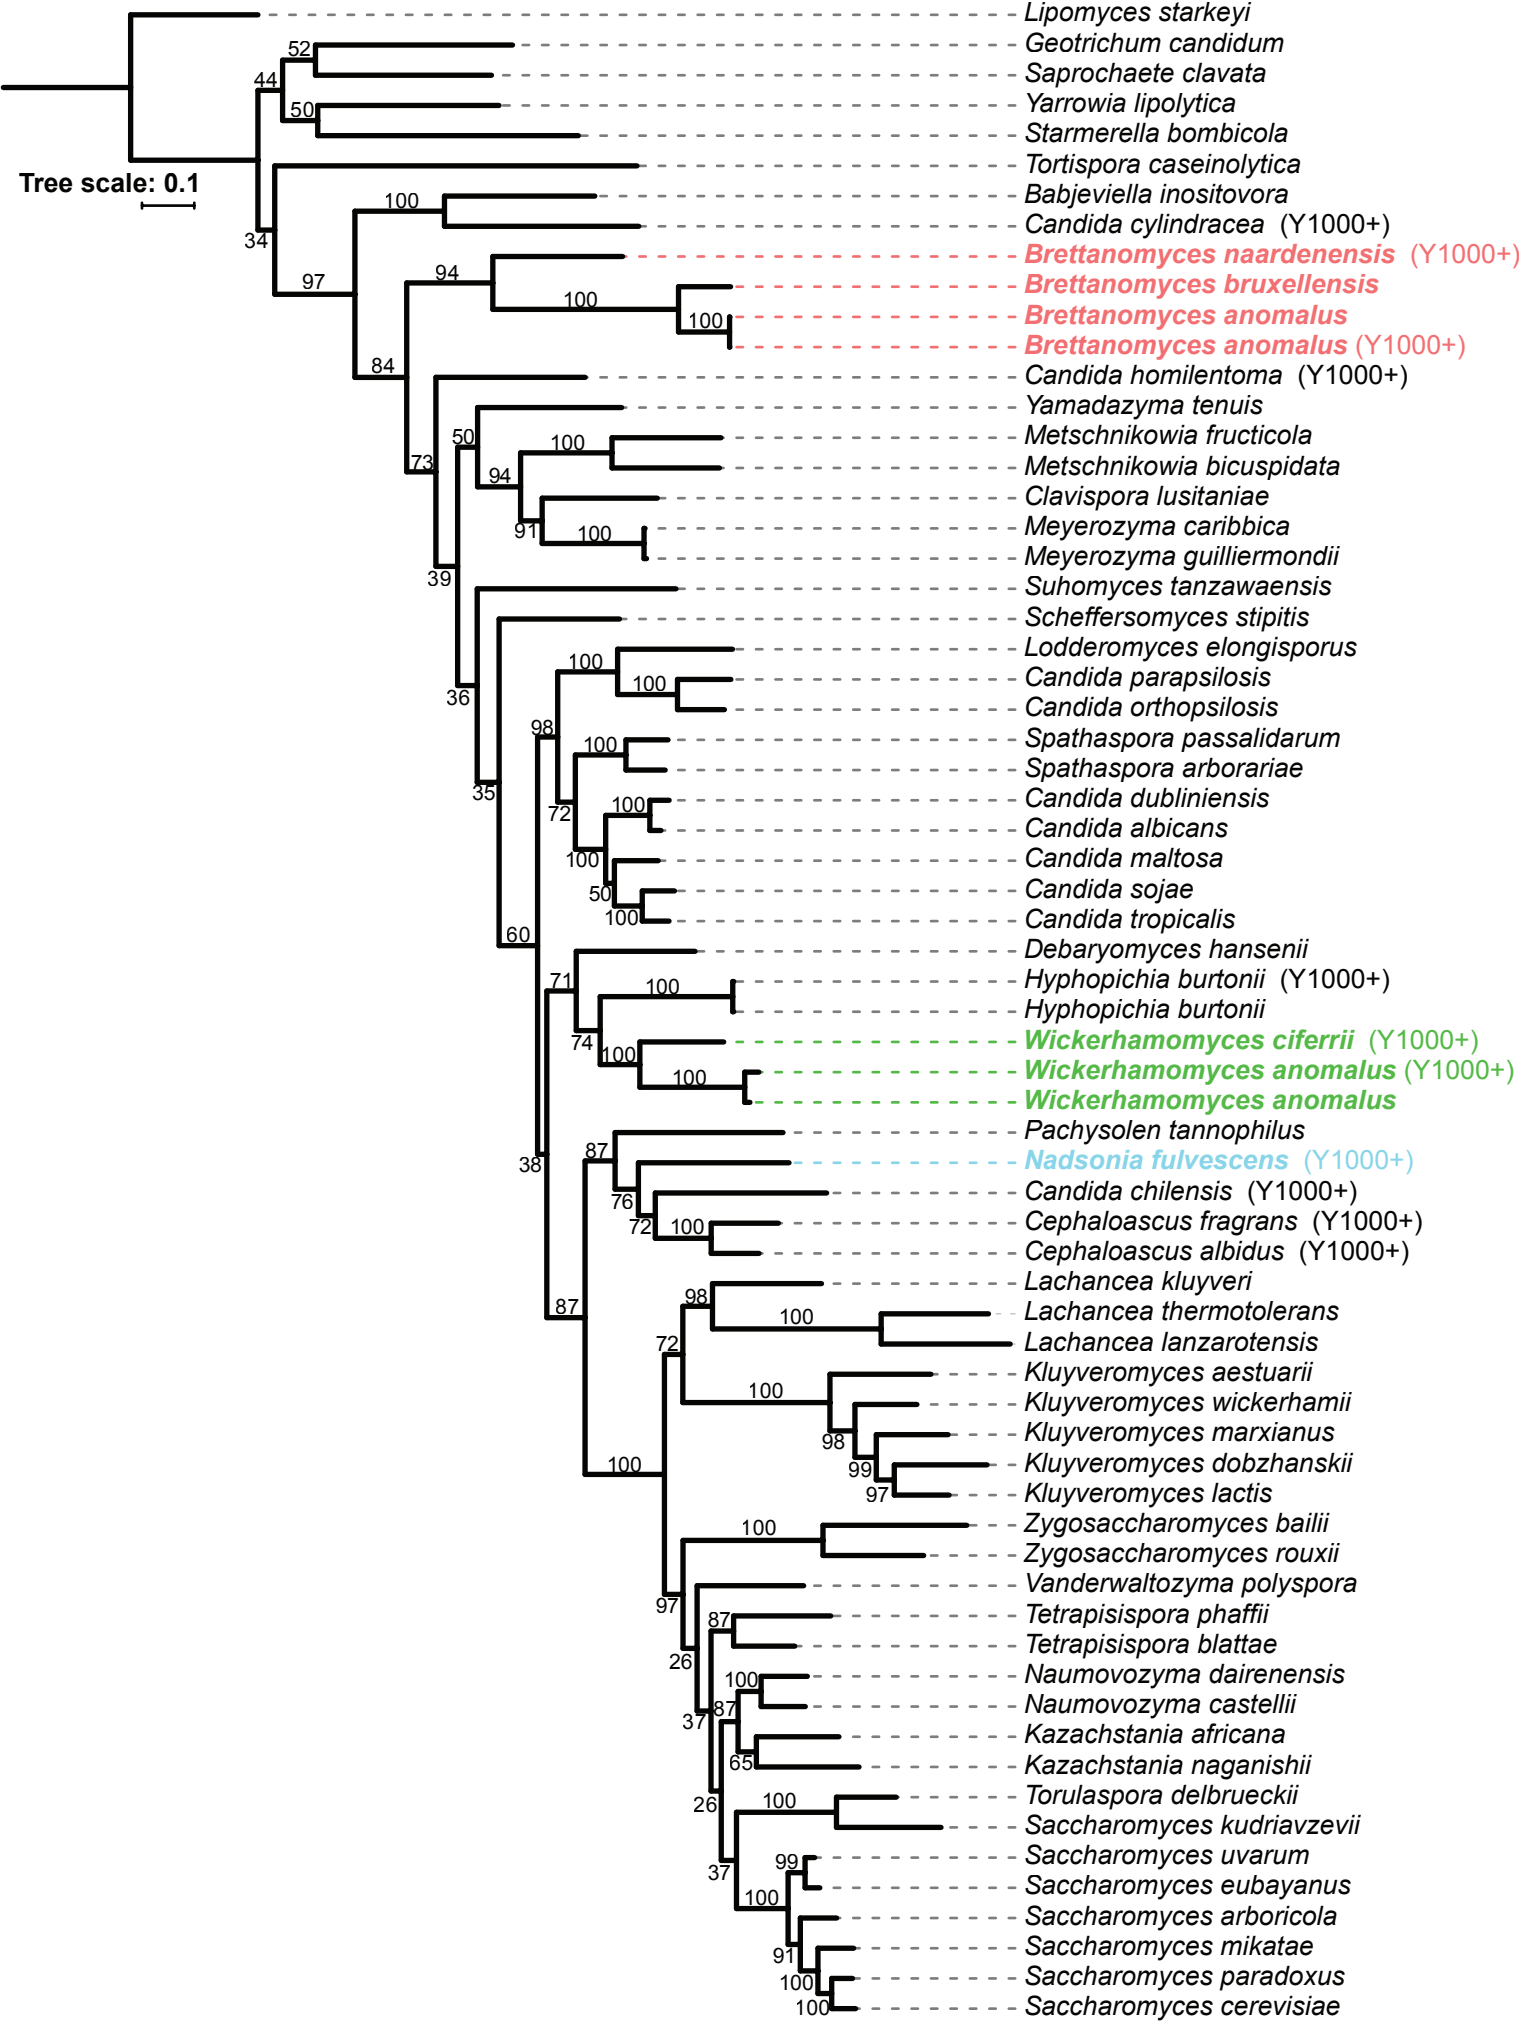

Supplemental Figure 10

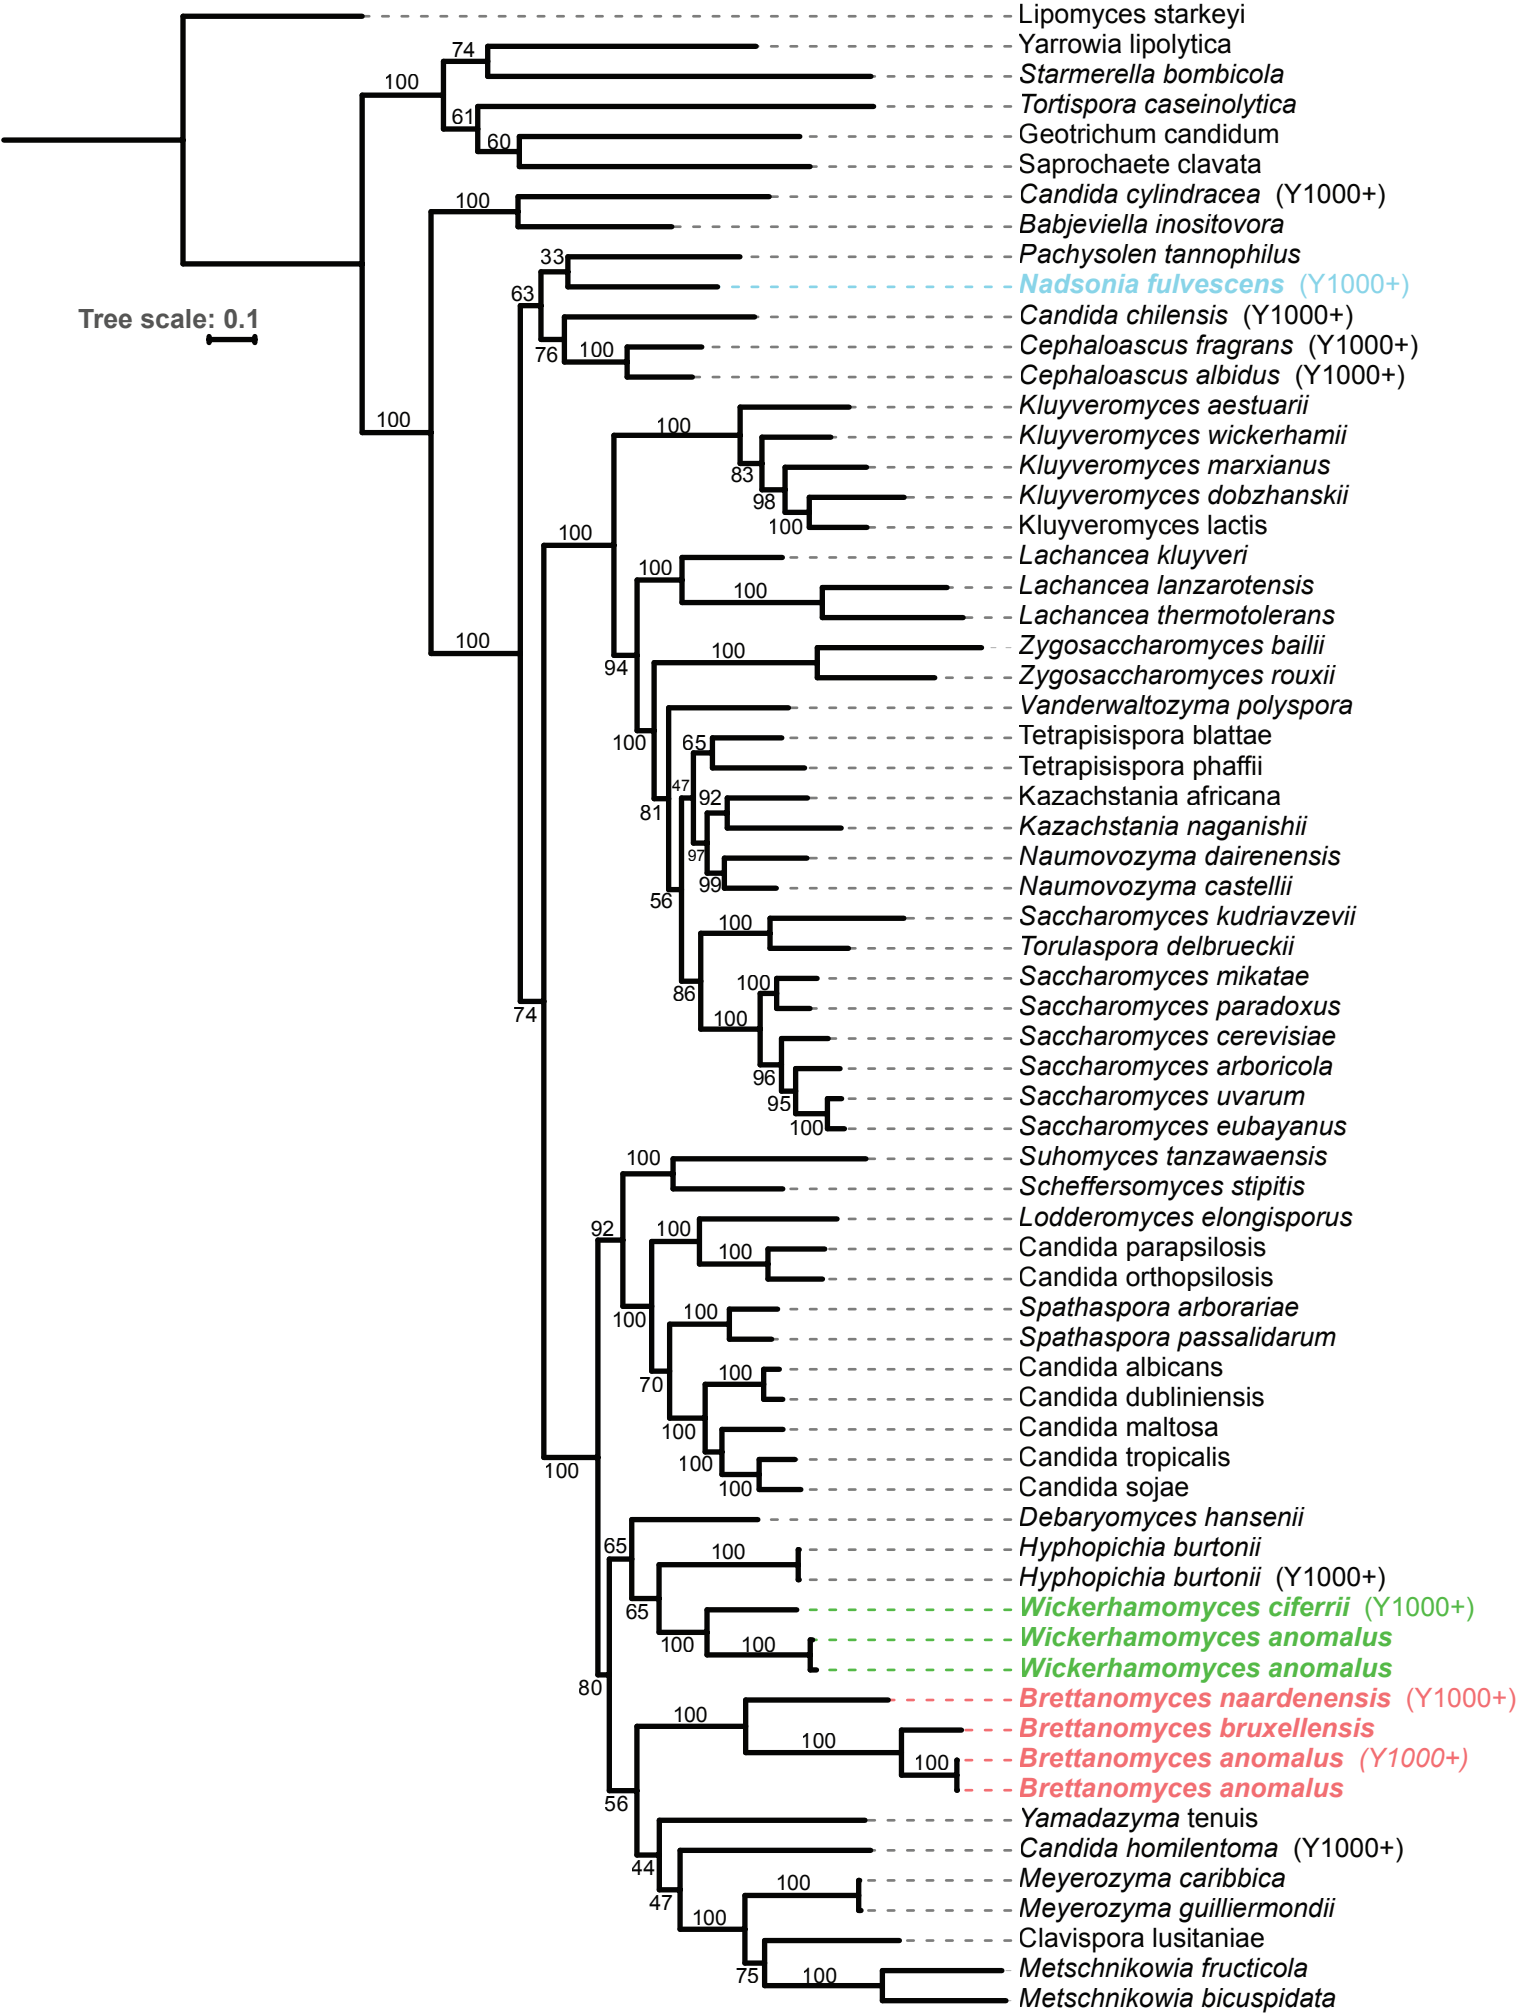

Supplemental Figure 11

A

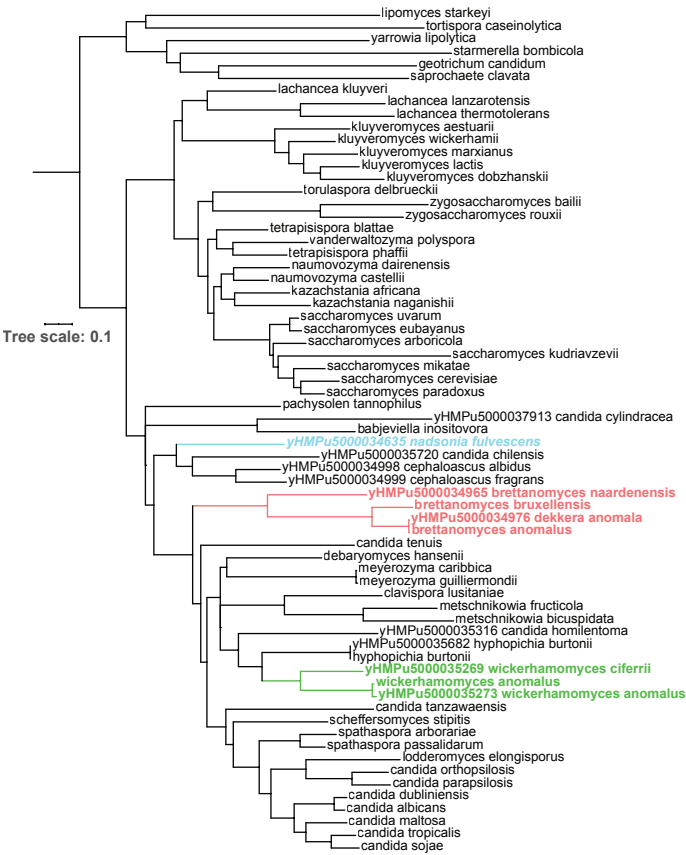

B

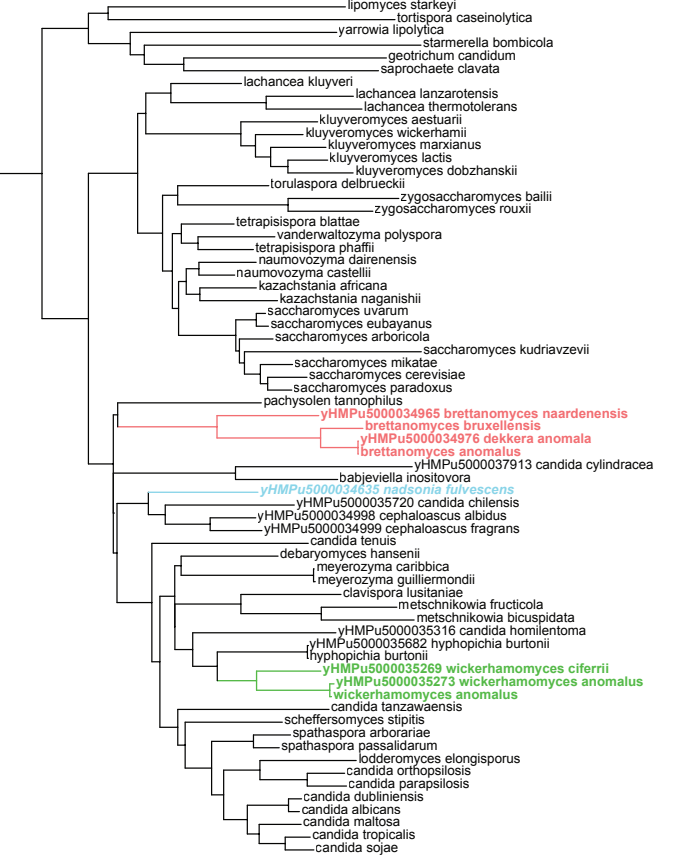

C

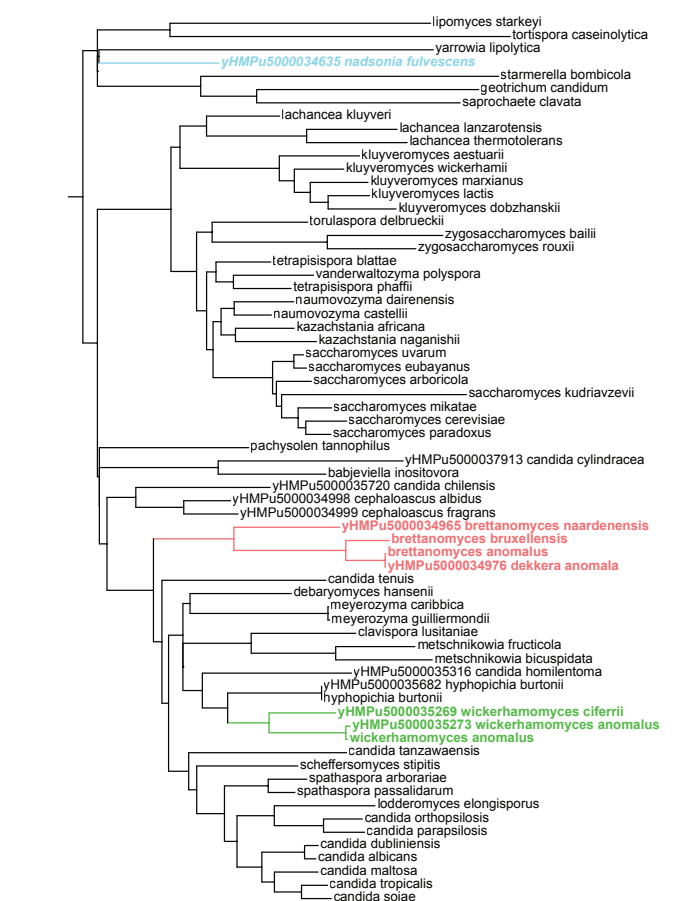

D

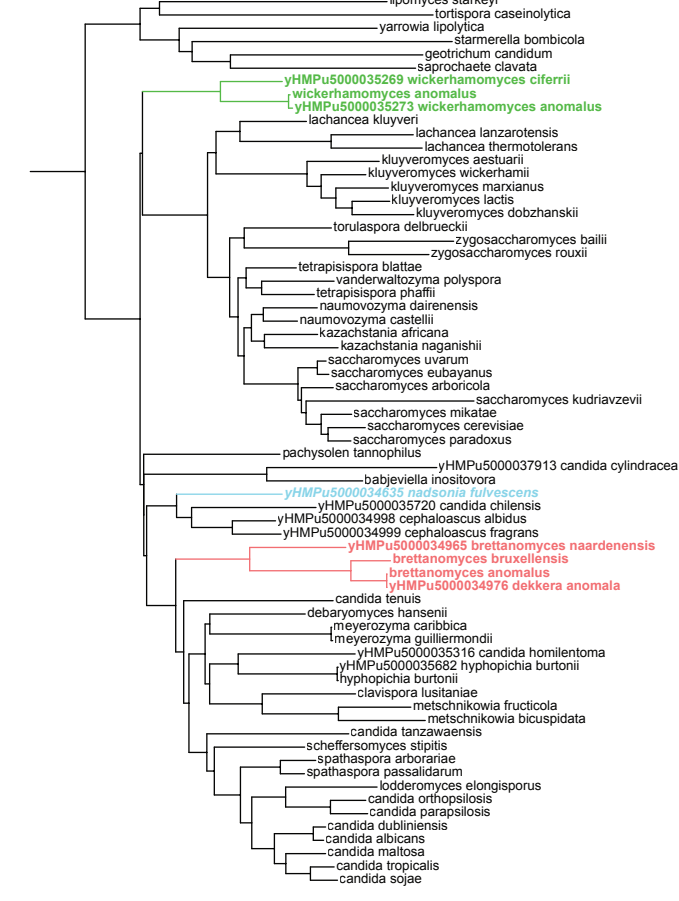

Supplement: Supplementary file 1 [file 1]
